# Supplementary material
Source: PubMed Central journal article supplement (PMC5234767)
Supplement: NIHMS841200-supplement-supplement_1.pdf [file NIHMS841200-supplement-supplement_1.pdf]

# Supplemental Materials

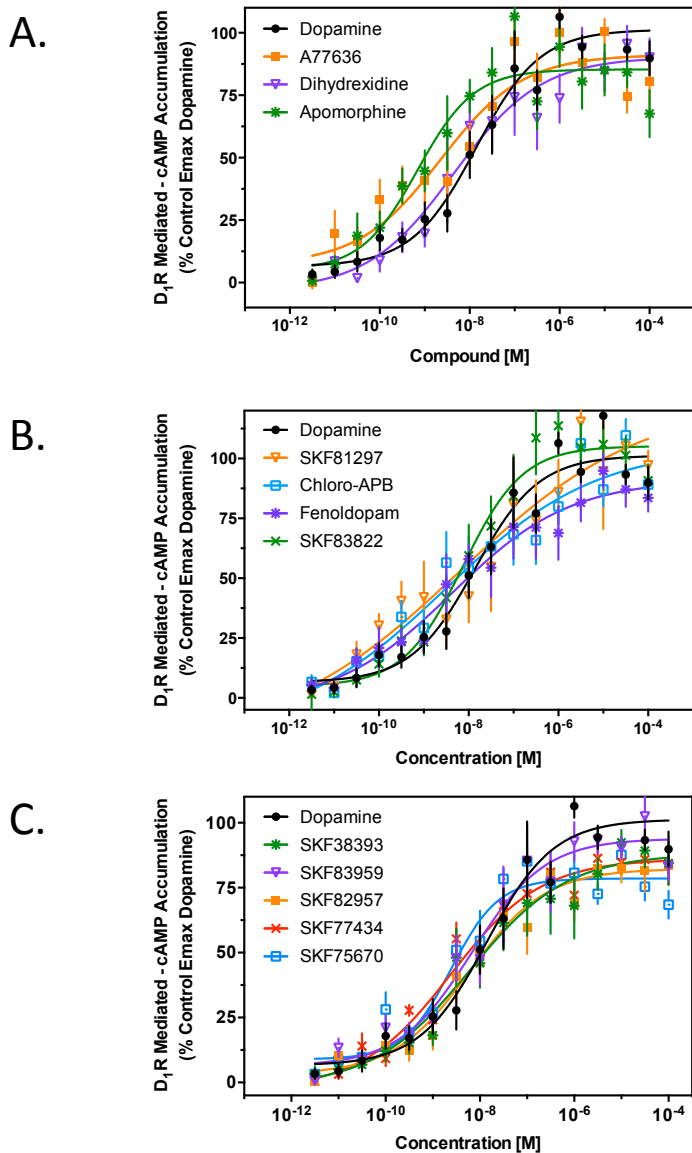

**Supplemental Figure 1.** CHO cells stably expressing the D<sub>1</sub>R were assayed for agonist stimulation of cAMP accumulation as described in the Materials and Methods. Cells were stimulated with the indicated concentrations of dopamine or test compound. **A.** Cells were stimulated with the D<sub>1</sub>R-selective agonists A77636, dihydropyridine, or apomorphine. **B.** Cells were stimulated with the indicated substituted benzazepines that did not exhibit bias at the D<sub>1</sub>R. **C.** Cells were stimulated with substituted benzazepines that behaved as G protein biased agonists at the D<sub>1</sub>R. All data are means of at least three independent experiments done on different days in triplicate and expressed as a percentage of the maximum signal given by dopamine, N=3-4.
